# Supplementary material
Source: PubMed Central journal article supplement (PMC3973153)
Supplement: NIHMS565950-supplement-Suppl_figs__table.pdf [file NIHMS565950-supplement-Suppl_figs__table.pdf]

**Contents:**

**Supplemental Figure legends**

**Figure S1**

**Figure S2**

**Figure S3**

**Figure S4**

**Figure S5**

**Figure S6**

**Table S1**

## Supplemental Figure legends

**Figure S1. Unstained samples of (a) untransduced and (b) transduced cells, for flow cytometry experiments described in Figures 2 and 3.**

**Figure S2. In vivo dimerization of MEP results in higher short term engraftment.** NSG mice were transplanted with transduced MEP and administered CID or control vehicle from day -1 to day 14. Table shows the maximum bioluminescence for each mouse (photons/ second). Flow cytometry plots for bone marrow engraftment of human erythroid (glycophorin A+) cell engraftment are depicted (2 representative mice).

**Figure S3. F36VMpl transduced myelo-erythroid progenitors cultured with CID give rise to megakaryocytic cells, neutrophils and monocytes (in addition to erythroid cells).**

Megakaryocyte (CD41a+GlyA-) cell counts of cultures (+/- CID) generated from transduced (a) CMP or (b) MEP. (one representative experiment of four shown,  $p < 0.05$ ). (c) Morphology of cells from day 35 of CID stimulated cultures of transduced CMP (Giemsa-Wright staining, 10x magnification).

◆ F36VMpl+CID    □ F36VMpl, no CID    ▲ F36V+CID

**Figure S4. Functional analysis of in vitro generated cells based on CD34 expression levels.** Transduced CD34+ cells were cultured with CID. (a) Three populations of GFP+ cells were seen on day 7 of culture: CD34 negative, CD34 dim and CD34 bright. (b) CFU output from each GFP+ population shown in (a), **isolated at day 7 of CID culture.**

**Figure S5. The erythropoietic effect of F36VMpl dimerization is not synergistic with that of erythropoietin.** Transduced CD34+ cells were cultured in serum-free medium with CID or erythropoietin (Epo) or both for 7 days. Flow cytometry plots show generation of erythroid (glycophorin A+) cells.

**Figure S6. Functional network analysis of genes differentially expressed in Thrombopoietin and Erythropoietin treated cells.** Transduced CD34+ cells were cultured in the presence of CID (see figure 7), (a) Thrombopoietin, (b) Erythropoietin or Control (no growth factors or CID). CD34+GFP+ cells were then sorted at day 7 and subjected to microarray. Shown is Ingenuity Pathway Analysis of hematopoietic functional networks showing genes significantly changed (red up- and green down-regulated) compared with Control arm ( $p < 0.05$ ).

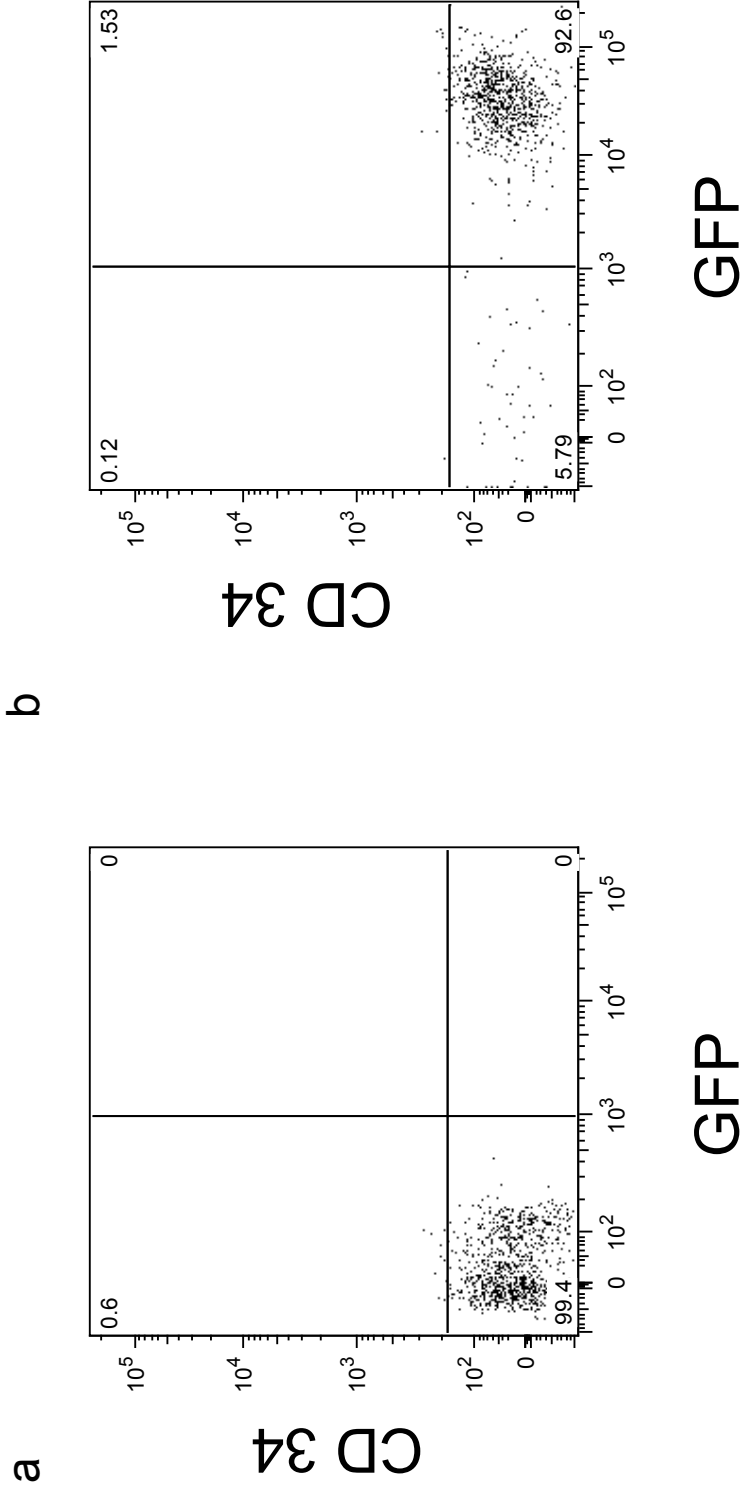

Figure S1

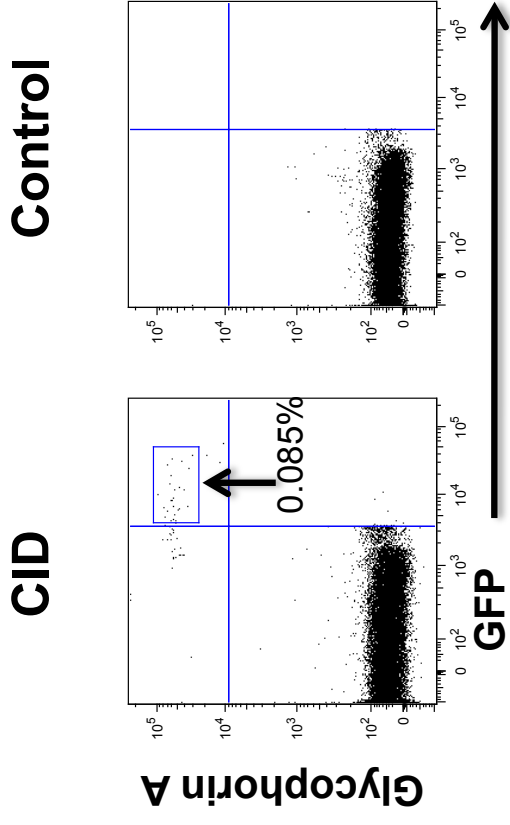

| <b>CID</b>   | <b>Control</b> |
|--------------|----------------|
| Experiment 1 |                |
|              | 323            |
|              | 23             |
|              | 627            |
|              | 49             |
|              | 350            |
|              | 92             |
|              | 855            |
| Experiment 2 |                |
|              | 15             |
|              | 0              |
|              | 618            |
|              | 0              |
|              | 610            |
|              | 14             |
| Experiment 3 |                |
|              | 1207           |
|              | 335            |
|              | 2398           |
|              | 821            |
|              | 699            |
|              | 304            |
| Experiment 4 |                |
|              | 1814           |
|              | 3229           |
|              | 1942           |
|              | 1914           |
|              | 1078           |
|              | 1236           |

**Figure S2**

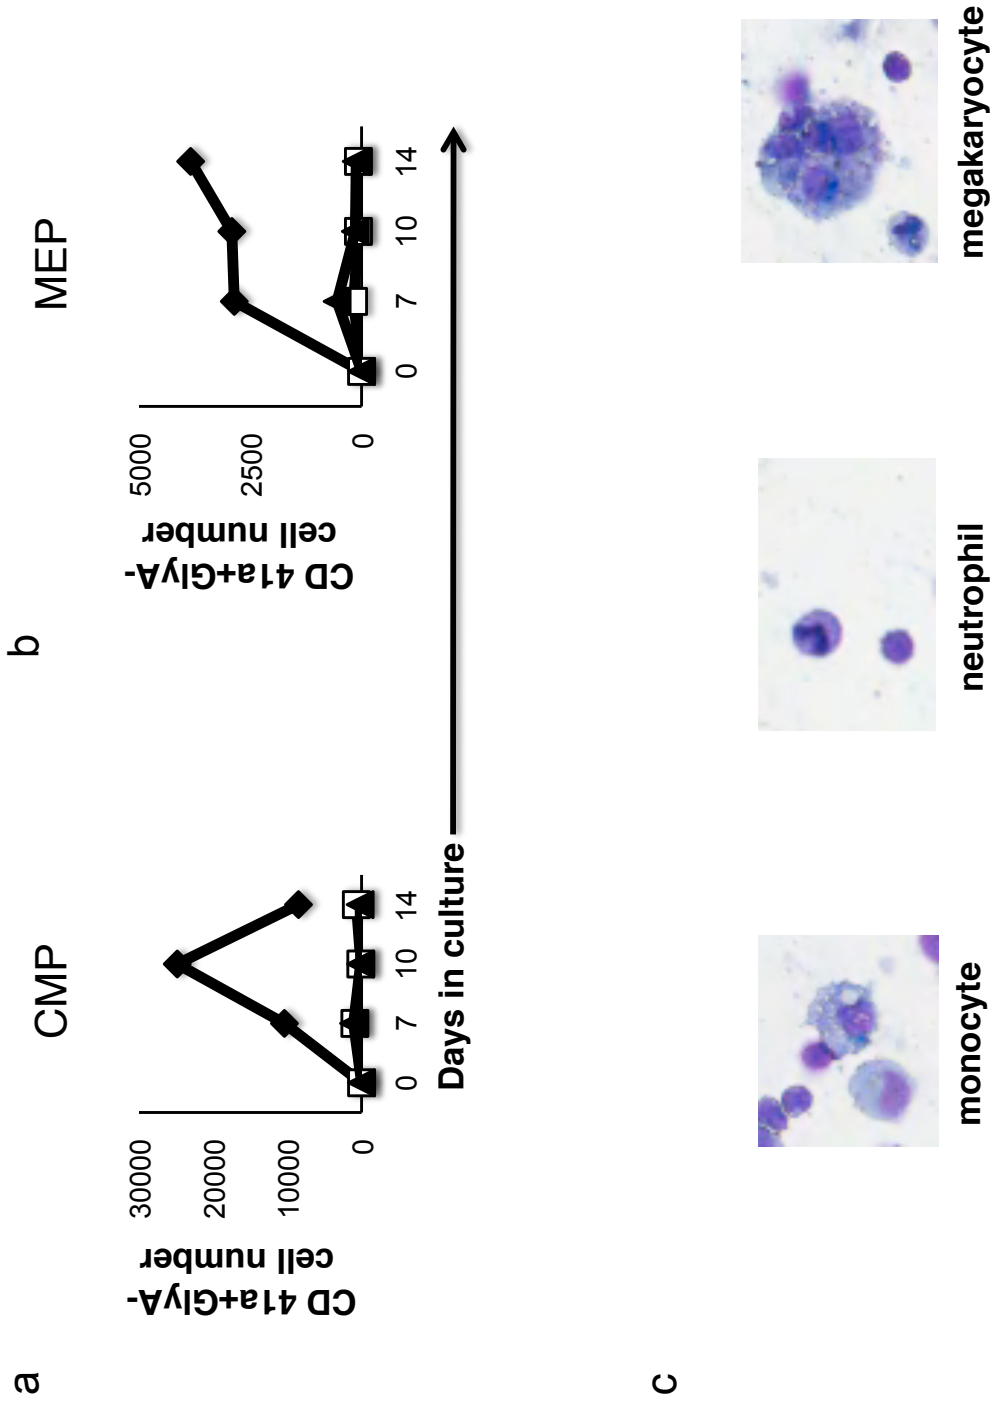

**Figure S3**

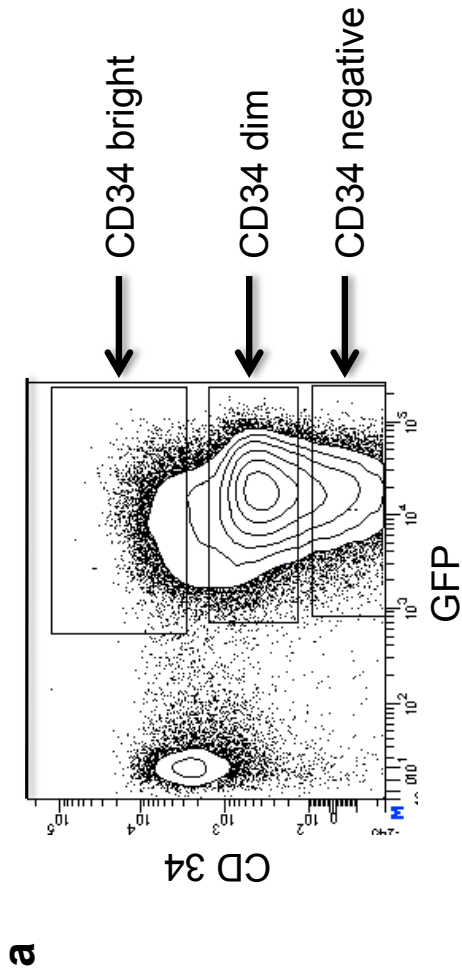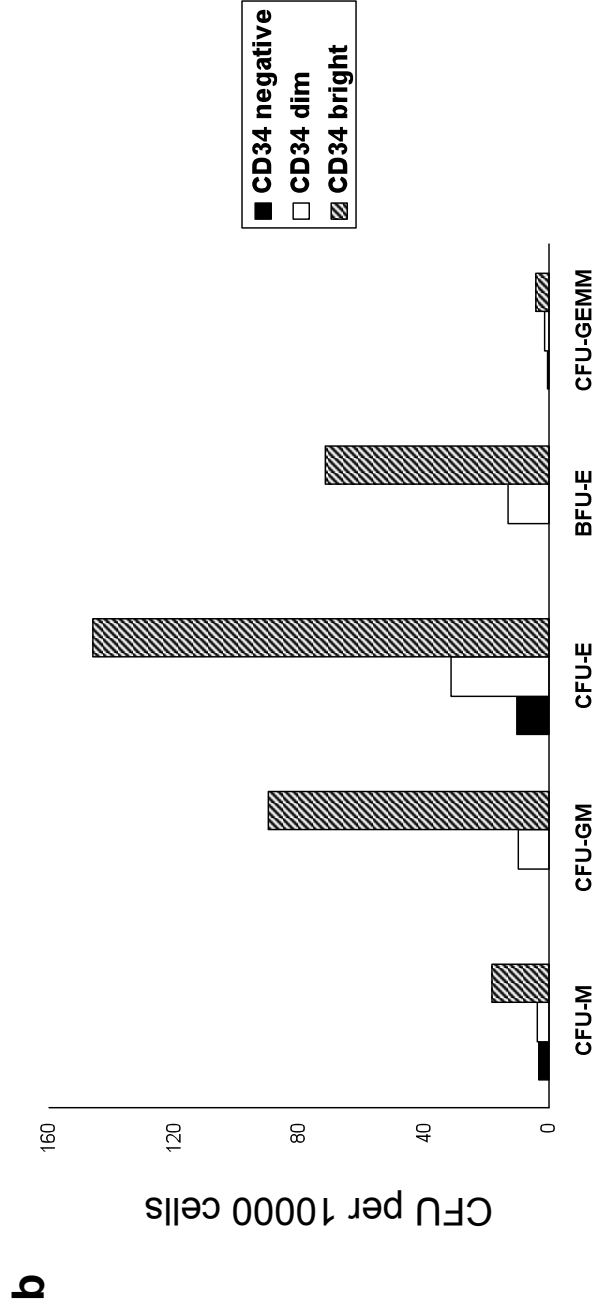

**Figure S4**

F36VMpi  
+CID

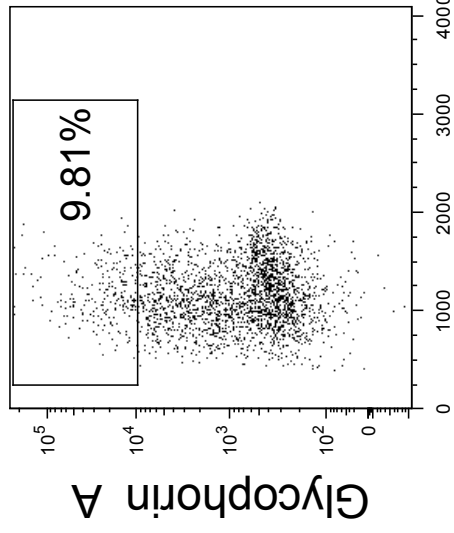

F36VMpi  
+Epo

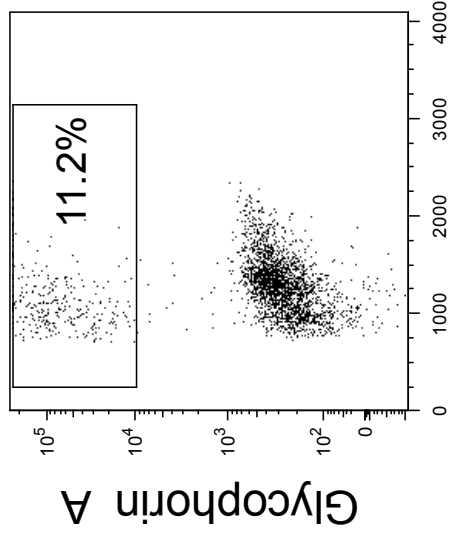

F36VMpi  
+CID+Epo

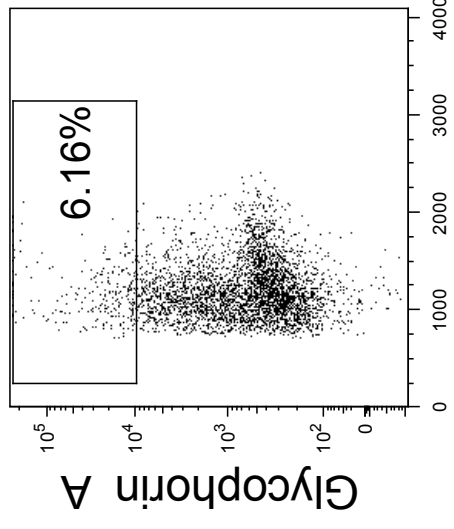

FSC

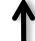

Figure S5



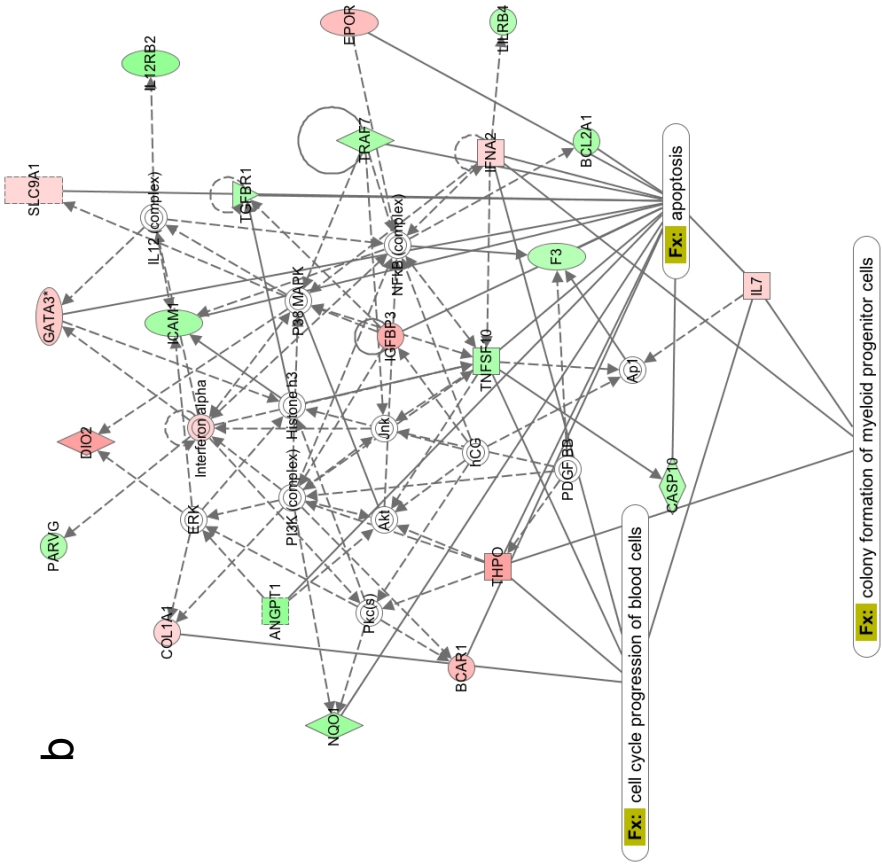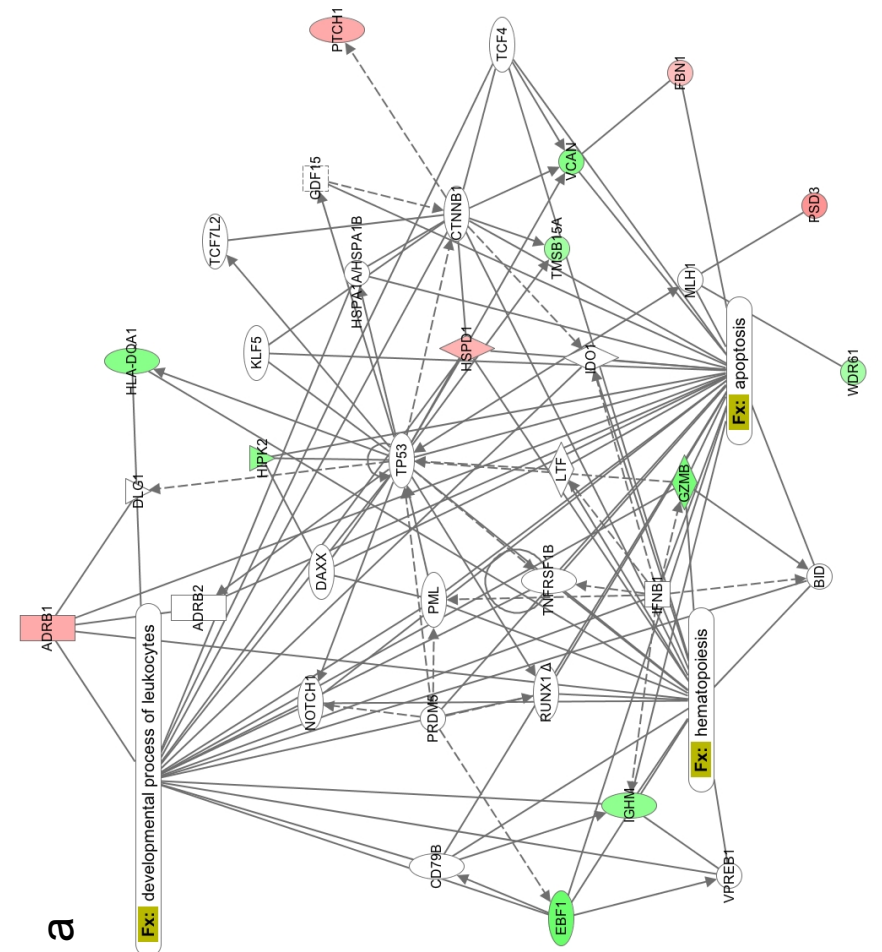

**Figure S6**

**Table S1. Expression of housekeeping genes.** CD 34+ cord blood cells were transduced with F36VMpl (or F36V) and cultured on MS-5 stroma +/- CID for 7 days. Equal numbers of CD34+GFP+ cells were sorted from culture and subjected to qPCR for housekeeping genes. C (T) values are depicted.

| Gene                 | F36VMpl+CID <sup>a</sup> | F36VMpl, no CID <sup>a</sup> | F36V+CID <sup>a</sup> |
|----------------------|--------------------------|------------------------------|-----------------------|
| 18S RIBOSOMAL RNA    | 16.08496157              | 13.91069984                  | 13.05308771           |
| BETA ACTIN           | 24.31303978              | 24.53920746                  | 23.24526405           |
| BETA 2 MICROGLOBULIN | 23.06636874              | 21.92607625                  | 21.53512764           |
| CYCLOPHILIN A        | 32.88670349              | 34.49984487                  | 31.33360004           |
| GAPDH                | 23.82501411              | 25.61851311                  | 24.48389149           |
| GUSB                 | 26.11511803              | 27.5204525                   | 26.76585865           |
| HRPT1                | 25.17496745              | 26.41327604                  | 25.59602451           |
| HSP90                | 25.67794673              | 25.47840309                  | 24.528409             |
| RPL13A               | 24.19448407              | 24.58424886                  | 23.66492176           |
| RPLP0                | 37.50414658              | 37.14509583                  | 38.183815             |
| TFRC                 | 22.93961716              | 25.83306567                  | 25.29926586           |
| UBC                  | 33.92548434              | 33.71979713                  | 33.61040211           |

<sup>a</sup> C (T) value
